# Supplementary material
Source: PubMed Central journal article supplement (PMC3981172)
Supplement: emboj201363s1.pdf [file emboj201363s1.pdf]

## **Supplementary Materials**

### **Supplementary Methods**

#### **Phylogenetic analysis**

43 amino acid sequences of Dis3, Dis3L and Dis3L2 proteins, including the SPAC2C4.07c gene product, used in the phylogenetic analyses, were obtained from NCBI Entrez and the Genome Portal of the Department of Energy Joint Genome Institute (Grigoriev et al, 2012) and are described in Supplementary Table 3.

CLANS (Frickey & Lupas, 2004) was used to visualize the relationships between different Dis3 proteins according to their pairwise sequence similarities with P-value cutoff at  $10^{-10}$ .

Sequences were aligned using SeaView (Gouy et al, 2010). To estimate phylogenetic relationships the protein sequences were analysed using the Neighbour Joining (NJ), Maximum Parsimony (MP) and Bayesian inference (BI) methods. NJ analysis was performed using BioNJ (Gascuel, 1997) with the Kimura or Poisson distance and 1000 bootstrap replicates. For MP analysis PAUP\* (Swofford, 2003) version 4.0b10 was used, with 1000 bootstrap replicates to assess the reliability of nodes. Consensus tree (50%) with bootstrap support values was calculated using the SumTrees program of the DendroPy package version 3.12.0 (Sukumaran & Holder, 2010). Bayesian inference analysis was performed using MrBayes version 3.1.2 (Ronquist & Huelsenbeck, 2003) with 500 000 generations of each MCMC search sampled every 10 generations, and mixed fixed-rate models. Burnin values corresponded to 25% of the samples. Trees were visualized using Dendroscope (Huson et al, 2007).

#### **Microarray analysis**

Yeasts were grown up to early exponential phase at YES media and total RNA was extracted as described. The quality was assessed with a BioAnalyzer (Agilent Technology). RNA was processed for use on GeneChip Yeast Genome 2.0 Array from Affymetrix, according to the manufacturer's protocol. Three independent biological samples were analysed for each strain. Hybridization, scanning and detection procedures were done at the Genomics Unit of the Instituto Gulbenkian de Ciência.

Subsequent exploration, normalization, summarization and analyses of the generated Affymetrix CEL files were performed using R free statistical software (<http://cran.r-project.org/>) and its associated tool for high-throughput genomic data, Bioconductor (<http://www.bioconductor.org/>).

The reliability of the data set, before and after normalization, was estimated through its statistical exploration. For each strain, the summarized probe set intensities were calculated using the Robust MultiArray Averaging (RMA) method (Bolstad et al, 2003; Irizarry et al, 2003). The empirical Bayes statistics was used to analyze the data because it provides a robust estimate of variance for each gene. It indeed assumes that genes expressed at similar levels exhibit similar variance which leads to the smoothing of standard errors associated to the fold-change logs (Hatfield et al, 2003). The multiple testing issue was furthermore taken into account through the calculation of the False Discovery Rate (FDR) according to Benjamini-Hochberg method (Benjamini et al, 2001).

#### **pFA6a TAP Kan MX6 plasmid construction**

GFP sequence was removed from the pFA6a GFP kan MX6 vector using restriction enzymes PacI AscI (Fermentas). The TAP tag sequence was then cloned into the plasmid using SLIC method according to the protocol (Li & Elledge, 2007). TAP tag sequence was amplified using pJL72 vector template. Primers used are listed in Supplementary Table 2.

#### **Dis3L2 protein purification**

Proteins were expressed in BL(21) pRIL cells grown in full media at 37°C until OD<sub>600</sub> 0.6 and then expression was induced for overnight at 20°C, subsequently cells were harvested, resuspended in lysis buffer (300mM NaCl, 1mMDTT, 50mM Phosphate buffer pH 7) and lysed using French press. Lysates were clarified by ultracentrifugation and protein purification was performed using GST-trap column according to manufacturer's instructions (GE Healthcare). The proteins were additionally purified using cation exchange column (HiTrap SP HP) according to manufacturer's instructions (GE Healthcare). After purification the proteins were concentrated to about 100 µg/µl using viva spin 500 columns (Sartorius stedim). The concentration of proteins was monitored using Bradford method and SDS-PAGE gels. Protein solutions were finally diluted until 50% in glycerol and kept at -80°C.

### **Substrate labeling**

For all assays described in the text HPLC, purified RNA or DNA oligonucleotides were used (<http://www.stabvida.net/>). Oligonucleotides were 5' labeled with radioactive phosphate using PNK (Fermentas) and  $\gamma\text{P}^{32}\text{ATP}$  and the substrate purified using G-50 columns (GE Healthcare). Substrates were then added to the reactions directly or supplemented with a known concentration of the non-labeled oligonucleotide. To create double-stranded substrates a complementary non-labeled DNA oligonucleotide was mixed with the radioactive oligo in a 2:1 molar ratio, samples were then denatured and cooled down slowly for annealing. Integrity of the double-stranded substrates was checked using native acrylamide gels (Malecki et al, 2010).

For the synthesis of the internally labeled substrate, in vitro transcription was carried out using the purified PCR product as template in the presence of an excess of  $[\text{32P}]\text{-}\alpha\text{-UTP}$  over unlabeled UTP with 'Riboprobe in vitro Transcription System' (Promega) and T7 RNA polymerase. Radioactive transcripts were purified by electrophoresis on an denaturing polyacrylamide gel. The gel slice was crushed and the RNA eluted with elution buffer (3 M ammonium acetate pH 5.2, 1mM EDTA, 2.5% (v/v) phenol pH 4.3), overnight at room temperature. The RNA was ethanol precipitated and resuspended in RNase free water.

### **RNA isolation**

Cells were thawed on ice, resuspended in the cold AES buffer (0.5 % SDS, 50mM NaAc pH 5.2, 10mM EDTA) and then transferred to the tubes containing phenol solution and glass beads (Sigma 425-600  $\mu\text{m}$ ). Cells were lysed in phenol using FastPrep-24 equipment (MP Biomedicals) – 3 times maximum speed for 25 s. Subsequently the solution was incubated in  $65^{\circ}\text{C}$  for 30 min with vortex every 10 min, than centrifuged and aqueous fraction was transferred to the fresh tube with phenol. Solution was vortex for 5 min, centrifuged and the aqueous fraction was transferred to the fresh tube with chlorophorm: isoamyl alcohol solution (24:1). Solution was vortex for 5 min, centrifuged and aqueous fraction was transferred to the fresh tube. Subsequently NaAc (pH 5.3) was added to 300 mM and RNA was precipitated with ethanol.

## Supplementary Figures

### Supplementary Figure 1

| SPBC26H8.10                                                                       | SPAC2C4.07c                                                                       | SPBC609.01                                                                        | SPCC16C4.09                                                                       | SPCC23B6.06                                                                        | systematic name                                                              |
|-----------------------------------------------------------------------------------|-----------------------------------------------------------------------------------|-----------------------------------------------------------------------------------|-----------------------------------------------------------------------------------|------------------------------------------------------------------------------------|------------------------------------------------------------------------------|
| 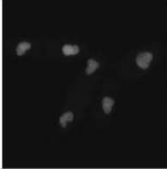 |  |  |  |  | localisation of overexpressed GFP fusion (data from RIKEN www.riken.jp/SPD/) |
| inviable                                                                          | viable                                                                            | inviable                                                                          | viable                                                                            | viable                                                                             | deletion phenotype                                                           |
| Dis3                                                                              | -                                                                                 | -                                                                                 | Ssd1                                                                              | Dss1                                                                               | <i>S. cerevisiae</i> orthologs                                               |
| yes                                                                               | yes                                                                               | no                                                                                | no                                                                                | yes                                                                                | conservation of exoribonucleolytic active site                               |

**Figure S1** Listed *S. pombe* genes that encode proteins with RNase II/R domain, with localization data from (Matsuyama et al, 2006). Phenotype and budding yeast homologue information from Pombase (<http://www.pombase.org/>) (Wood et al, 2012).

## Supplementary Figure 2

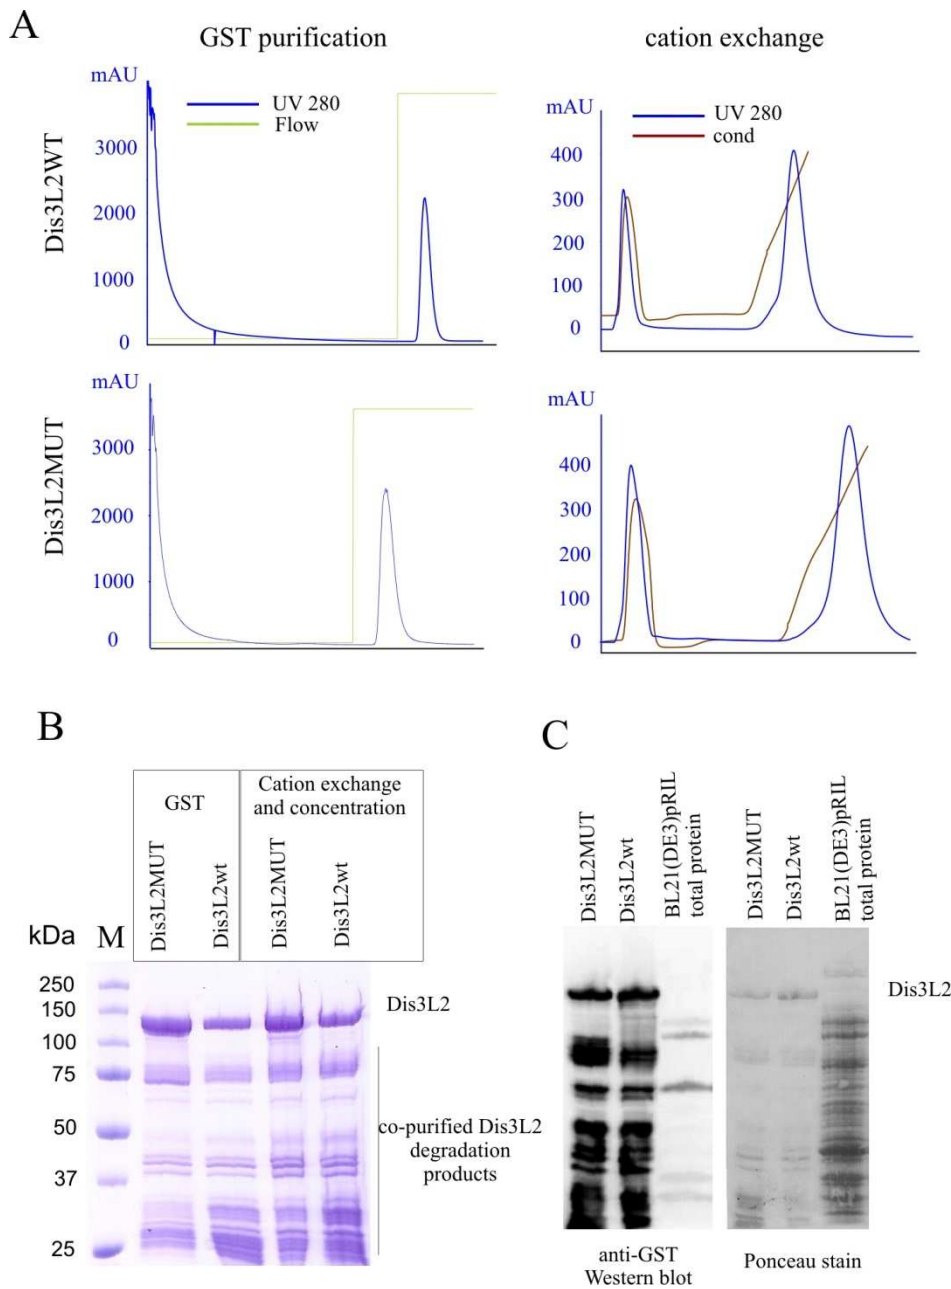

**Figure S2** Dis3L2 purification. **(A)** GST fusions of Dis3L2 wild type (Dis3L2WT) and mutated version (Dis3L2MUT) were purified using GST affinity chromatography followed by cation exchange chromatography. **(B)** SDS-PAGE analysis of purification products. The size of the full length Dis3L2 protein is indicated on the right. Preparations obtained after cation exchange and protein concentration were used in the assays. **(C)** Purified protein preparations were subjected to Western blot analysis against GST to investigate the nature of lower molecular weight contaminants. Contaminations consisted on Dis3L2-GST protein degradation by-products as indicated in the picture. The total protein extract from the bacteria used for protein expression was used (BL21(DE3)pRIL) as control. The weaker signal of target protein in Western blot is due to signal saturation.

### Supplementary Figure 3

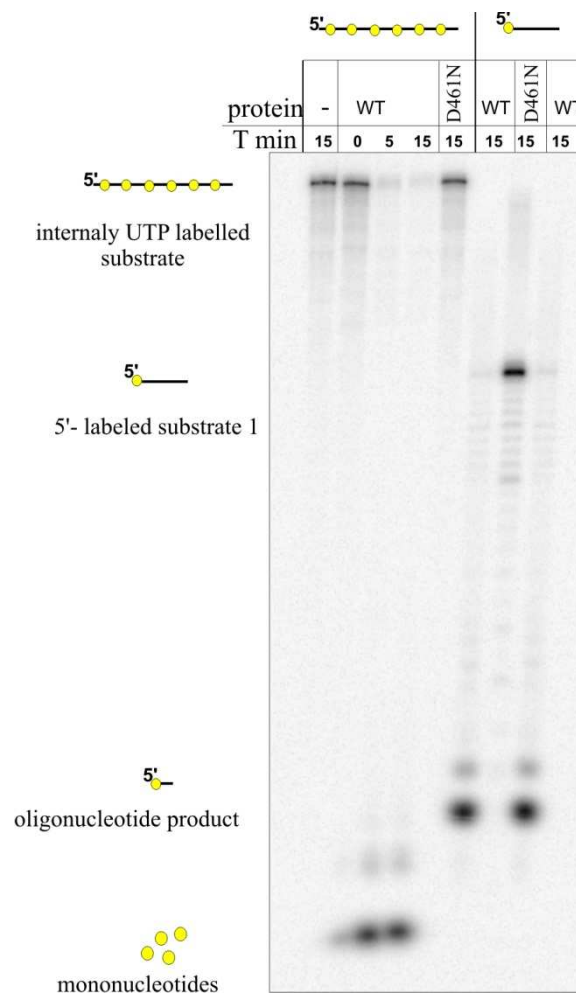

**Figure S3** Dis3L2 is a processive 3-5' exonuclease. Around 0.5 pmols of purified wild type protein Dis3L2 (WT) and its mutated version (D461N) were incubated with 0.2 pmols of either an internally labeled RNA substrate (see Supplementary Table 2) or a 5'-end labeled substrate (substrate 1). Reactions were stopped at the indicated times and products were separated on denaturing polyacrylamide gel. The size of the different substrates and reaction products are indicated.

Supplementary Figure 4

A

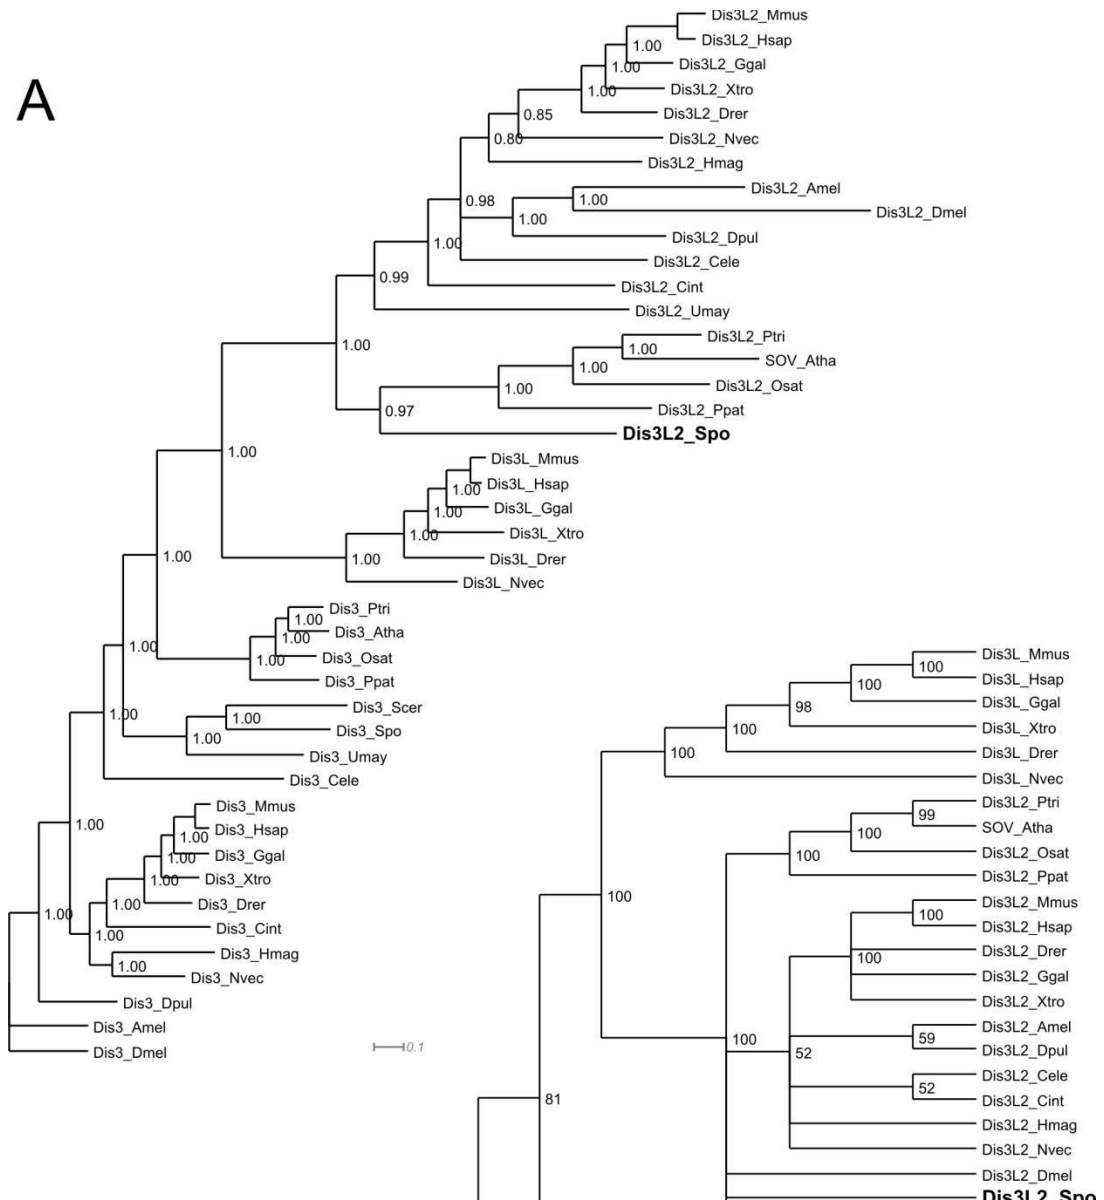

B

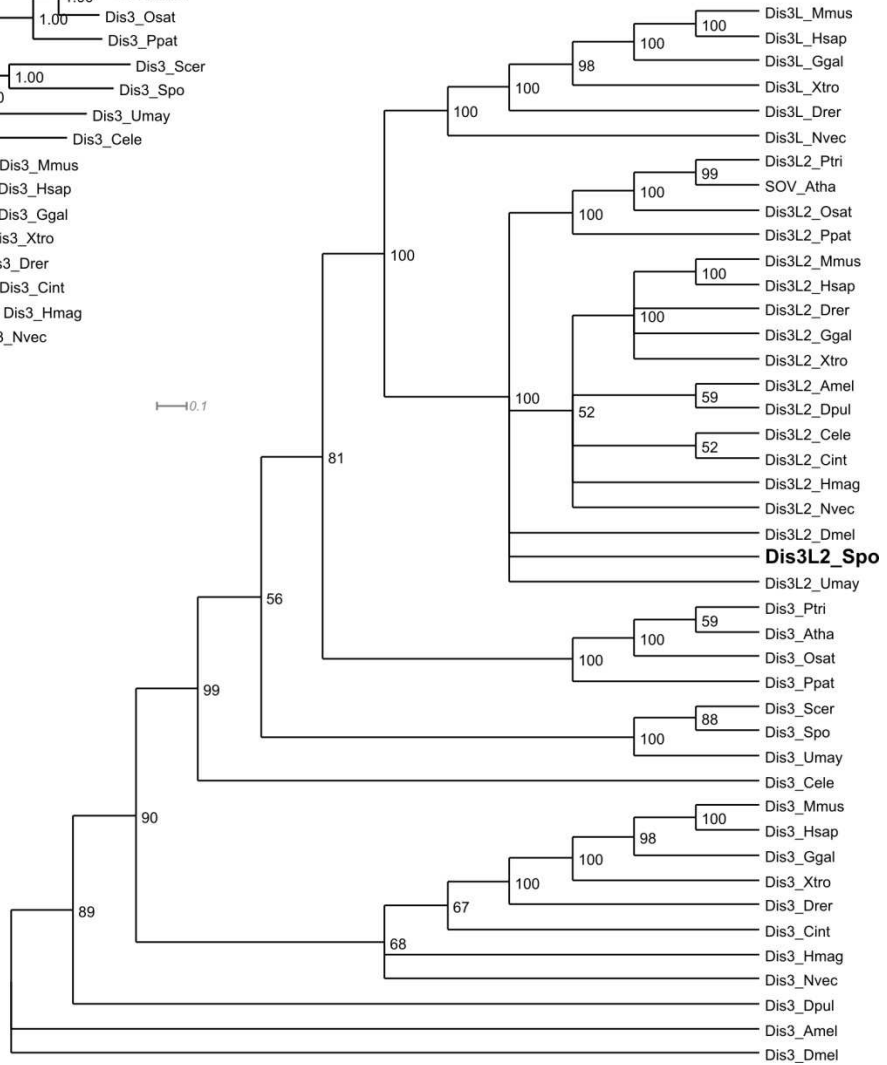

C

|                                                               |   |   |   |   |   | 10 |   |   |   |   |   |   |   |
|---------------------------------------------------------------|---|---|---|---|---|----|---|---|---|---|---|---|---|
| <i>Dis3_gi 328786997_Apis_mallifera/455-467</i>               | P | P | G | C | T | D  | I | D | D | A | L | H | C |
| <i>Dis3_gi 24649634_Drosophila_melanogaster/487-499</i>       | P | P | G | C | T | D  | I | D | D | A | L | H | C |
| <i>Dis3_gi 321478602_Daphnia_pulex/477-489</i>                | P | P | G | C | T | D  | I | D | D | A | L | H | F |
| <i>Dis3_gi 198429347_Ciona_intestinalis/452-464</i>           | P | P | G | C | T | D  | I | D | D | C | L | H | H |
| <i>Dis3_gi 190014623_Homo_sapiens/480-492</i>                 | P | P | G | C | T | D  | I | D | D | A | L | H | C |
| <i>Dis3_gi 145207992_Mus_musculus/480-492</i>                 | P | P | G | C | T | D  | I | D | D | A | L | H | C |
| <i>Dis3_gi 118084745Gallus_gallus/483-495</i>                 | P | P | G | C | T | D  | I | D | D | A | L | H | C |
| <i>Dis3_gi 171847251_Xenopus_tropicalis/475-487</i>           | P | P | G | C | T | D  | I | D | D | A | L | H | C |
| <i>Dis3_gi 326664018_Danio_reiro/477-489</i>                  | P | P | G | C | T | D  | I | D | D | A | L | H | C |
| <i>Dis3_ 10544 gw.129.26.1_Nematostella_vactensis/478-490</i> | P | P | G | C | T | D  | I | D | D | A | L | H | W |
| <i>Dis3_gi 221101666_Hydra_magnipapillata/470-482</i>         | P | P | G | C | T | D  | I | D | D | A | L | H | W |
| <i>Dis3_gi 212645896_Caenorhabditis_elegans/492-504</i>       | P | L | G | C | T | D  | I | D | D | A | L | H | C |
| <i>Dis3_gi 224071355_Populus_trichocarpa/484-496</i>          | P | P | G | C | K | D  | I | D | D | A | L | H | C |
| <i>Dis3_gi 18398450_Arabidopsis_thaliana/482-494</i>          | P | P | G | C | K | D  | I | D | D | A | L | H | C |
| <i>Dis3_gi 222624135_Oryza_sativa/469-481</i>                 | P | P | G | C | R | D  | I | D | D | A | L | H | C |
| <i>Dis3_gi 168027129_Physcomitrella_patens/501-513</i>        | P | L | G | C | R | D  | I | D | D | A | L | H | C |
| <i>Dis3_gi 6324552_Saccharomyces_cerevisiae/544-556</i>       | P | P | G | C | V | D  | I | D | D | A | L | H | A |
| <i>Dis3_gi 19113445_Schizosaccharomyces_pombe/509-521</i>     | P | P | G | C | Q | D  | I | D | D | A | L | H | A |
| <i>Dis3_gi 154340223_Leishmania_braziliensis/410-422</i>      | P | L | G | C | R | D  | I | D | D | A | L | H | C |
| <i>Dis3L_gi 219521928_Homo_sapiens/479-491</i>                | P | K | G | C | E | D  | V | D | D | T | L | S | V |
| <i>Dis3L_gi 295293138_Mus_musculus/479-491</i>                | P | K | G | C | E | D  | V | D | D | T | L | S | V |
| <i>Dis3L_gi 363737633_Gallus_gallus/476-488</i>               | P | K | G | C | E | D  | V | D | D | A | L | S | V |
| <i>Dis3L_gi 1118403694_Xenopus_tropicalis/394-406</i>         | P | K | G | C | E | D  | V | D | D | A | L | S | I |
| <i>Dis3L_gi 160333118_Danio_reiro/473-485</i>                 | P | K | G | C | E | D  | V | D | D | T | L | S | V |
| <i>Dis3L_gi 156382055_Nematostella_vactensis/479-491</i>      | P | K | G | C | E | D  | V | D | D | T | L | S | I |
| <i>Dis3L2_gi 17553506_Caenorhabditis_elegans/315-326</i>      | P | K | T | A | R | D  | L | D | D | A | L | H | - |
| <i>Dis3L2_gi 198421184Ciona_intestinalis/403-414</i>          | P | P | S | A | R | D  | L | D | D | A | L | H | - |
| <i>Dis3L2_gi 134288890_Homo_sapiens/384-395</i>               | P | S | T | A | R | D  | L | D | D | A | L | S | - |
| <i>Dis3L2_gi 24233556_Mus_musculus/382-393</i>                | P | S | T | A | R | D  | L | D | D | A | L | A | - |
| <i>Dis3L2_gi 363737173_Gallus_gallus/384-395</i>              | P | S | T | A | K | D  | L | D | D | A | L | S | - |
| <i>Dis3L2_gi 118404918_Xenopus_tropicalis/355-366</i>         | P | A | T | A | R | D  | L | D | D | A | L | S | - |
| <i>Dis3L2_gi 292610486_Danio_reiro/348-359</i>                | P | A | T | A | R | D  | L | D | D | A | L | S | - |
| <i>Dis3L2_gi 156388005_Nematostella_vactensis/301-312</i>     | P | L | T | A | R | D  | L | D | D | A | L | H | - |
| <i>Dis3L2_gi 321453433_Daphnia_pulex/426-438</i>              | P | A | D | A | R | D  | L | D | D | A | V | S | G |
| <i>Dis3L2_gi 221123214_Hydra_magnipapillata/273-284</i>       | P | A | T | A | R | D  | L | D | D | A | V | S | - |
| <i>Dis3L2_gi 328786136_Apis_mallifera/301-312</i>             | P | D | A | A | V | D  | L | D | D | S | V | S | - |
| <i>Dis3L2_gi 24654592_Drosophila_melanogaster/573-584</i>     | P | M | T | A | R | D  | L | D | D | A | V | S | - |
| <i>Dis3L2_gi 19115422_Schizosaccharomyces_pombe/454-465</i>   | P | E | T | A | R | D  | L | D | D | A | V | S | - |
| <i>Dis3L2_gi 224066863_Populus_trichocarpa/405-416</i>        | P | S | S | A | T | D  | L | D | D | A | L | S | - |
| <i>Dis3L2_gi 15220899_Arabidopsis_thaliana/489-500</i>        | P | S | T | A | T | D  | L | D | D | A | L | S | - |
| <i>Dis3L2_gi 115448745_Oryza_sativa/476-487</i>               | P | P | T | A | T | D  | L | D | D | A | I | S | - |
| <i>Dis3L2_gi 168042407_Physcomitrella_patens/481-492</i>      | P | P | T | A | R | D  | L | D | D | A | L | S | - |
| <i>Dis3L2_gi 154340243_Leishmania_braziliensis/320-332</i>    | P | A | T | A | R | D  | L | D | D | A | L | S | I |

**Figure S4** Phylogenetic analyses of the Dis3 homologues in eukaryotes. Three distinct groups, corresponding to Dis3, Dis3L and Dis3L2 are apparent in all trees, and the SPAC2C4.07c gene product of *S. pombe* (Dis3L2\_Spo) is consistently classified with the Dis3L2 group. (A) 50% majority-rule consensus tree from 1000 bootstrap replicates of a maximum parsimony (MP) analysis, bootstrap support values shown for nodes. (B) Bayesian inference (BI) tree, with posterior probabilities of each node. (C) Conservation of active site consensus between different Dis3 like proteins.



## Supplementary Figure 5

A

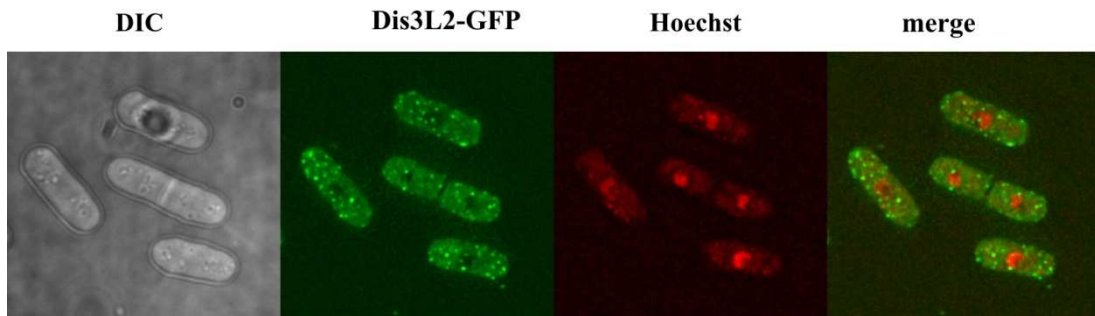

B

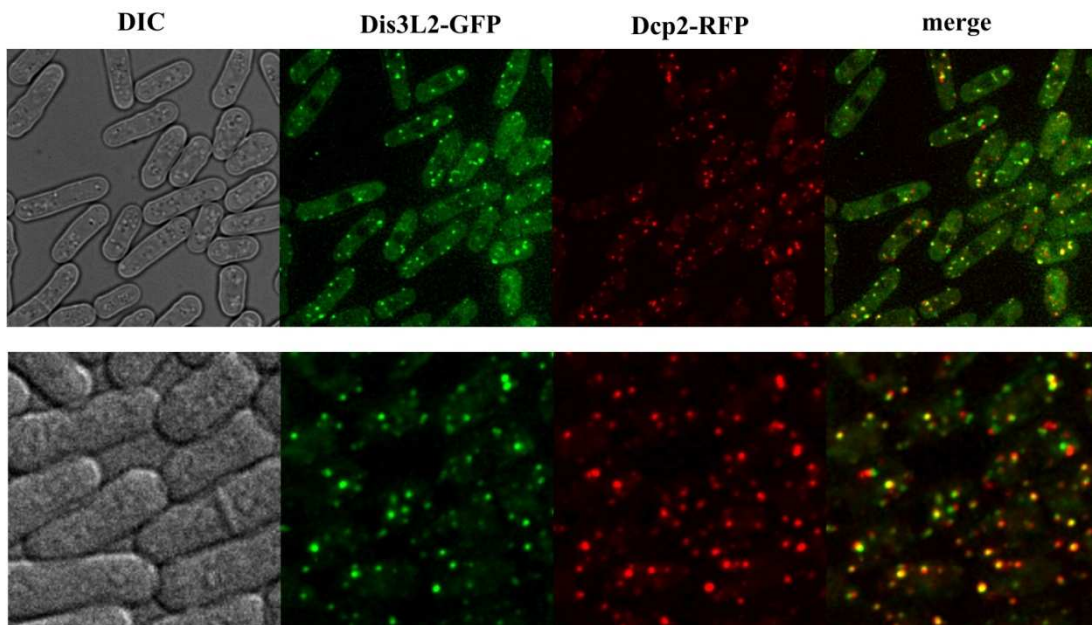

**Figure S5** Dis3L2 localizes in the cytoplasm and cytoplasmic foci. **(A)** Cells expressing Dis3L2-GFP were grown to mid-log phase in minimal medium (EMM) and the localization of epitope tagged protein was determined by fluorescence microscopy. Nucleus were stained with Hoechst and its co-localisation with Dis3L2-GFP signal was examined. **(B)** Dis3L2-GFP was examined for co-localization with Dcp2-RFP. Cells expressing Dis3L2-GFP and Dcp2-RFP were grown to mid-log phase in minimal medium (EMM) and then immediately subjected to microscopy.

**Supplementary Figure 6**

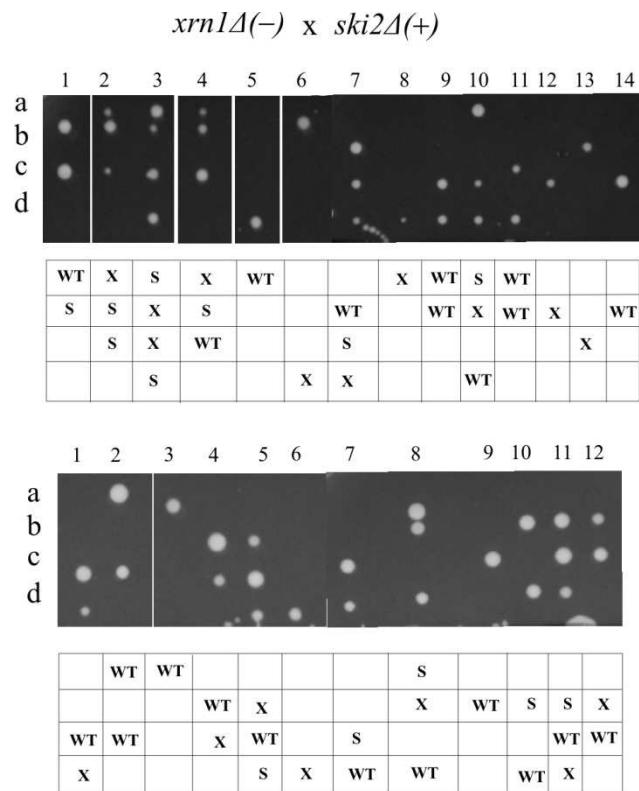

**Figure S6** *xrn1<sup>+</sup>* deletion is synthetically lethal with deletion of *ski2<sup>+</sup>*. Haploid *ski2<sup>+</sup>::hph* cells were crossed with *xrn1<sup>+</sup>::hph* strain. Resulting diploids were sporulated and tetrads were dissected on YES plates. Genotypes of the spores were analyzed by colony PCR and are described in the bottom tables: WT- wild type strain, X- *xrn1Δ*, S- *ski2Δ*.

### Supplementary Figure 7

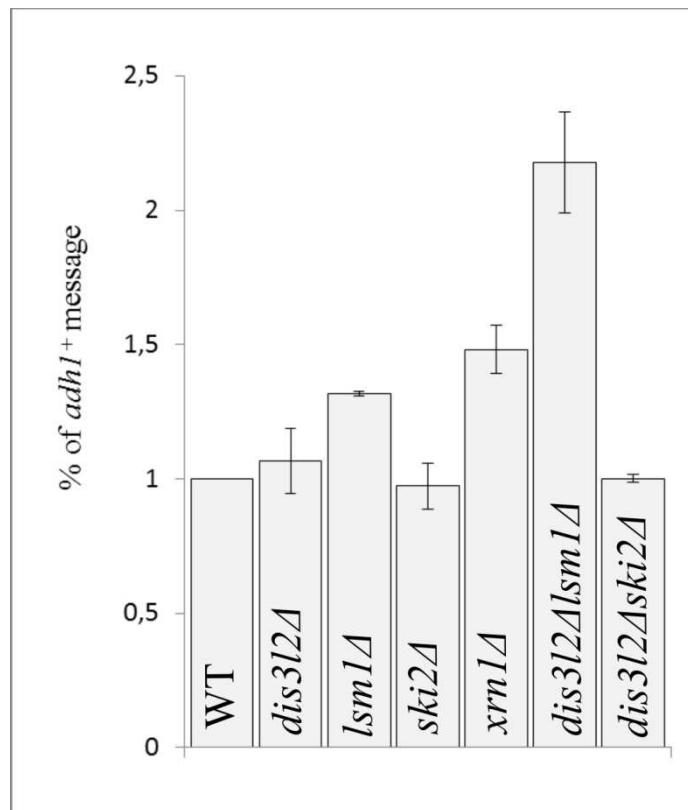

**Figure S7** *adh1*<sup>+</sup> transcript levels accumulates in a *dis3l2*Δ*lsm1*Δ background. Graph represents Northern blot results of *adh1*<sup>+</sup> mRNA analysis over total RNA from the wild type and different deletion mutant strains, from three independent experiments. Error bars represent standard deviation.

## Supplementary Figure 8

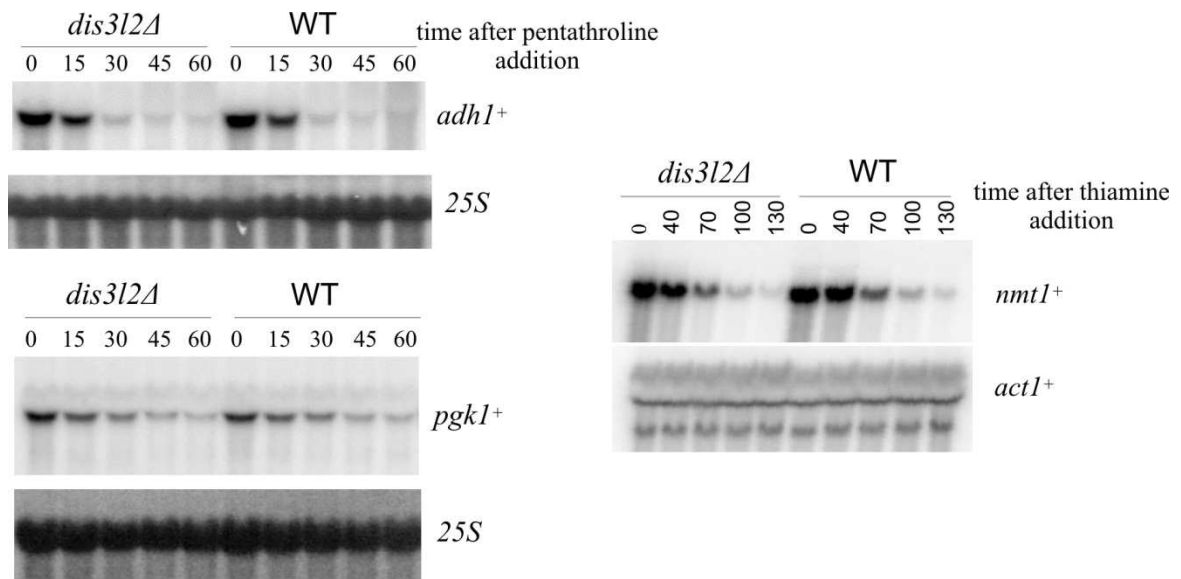

**Figure S8** No detectable difference was observed in mRNAs degradation rates between wild type yeast strain (WT) and *dis3l2Δ* mutant. Wild type and *dis3l2Δ* strains were grown in the full media (for *adh1*<sup>+</sup> and *pgk1*<sup>+</sup>) or minimal media (for *nmt1*<sup>+</sup>) until mid-log phase, subsequently transcription was stopped by either 1,10-pentanthroline (for *adh1*<sup>+</sup> and *pgk1*<sup>+</sup>) or thiamine (for *nmt1*<sup>+</sup>) addition. Cells were harvested at the indicated time points after transcriptional arrest, total RNA was isolated and mRNA decay analyzed by Northern blot.

## Supplementary Figure 9

### WT

CCCATCCTTTAAAAAAAAAAAAAAAAAAAAA (15)  
CCCATCCTTTAAAAAAAAAAAAAAAAAAAAA (28)  
CCCATCCTTTAAAAAAAAAAAAAAAAAAAAA 21  
CCCATCCTTTAAAAAAAAAAAAAAAAAAAAA (31)  
CCCATCCTTTAAAAAAAAAAAAAAAAAAAAA (19)  
CCCATCCTTTAAAAAAAAAAAAAAAAAAAAA (21)  
CCCCAAAAAAAAAAAAAAAAAAAAAAT (30)  
CCCATCCTTTAAAAAAAAAAAAAAAAAAAAA (27)  
CCCATCCTTTAAAAAAAAAAAAAAAAAAAAA (21)  
CCCATCCTTTAAAAAAAAAAAAAAAAAAAAA (31)  
CCCATCCTTTAAAAAAAAAAAAAAAAAAAAA (19)  
CCCATCCTTTAAAAAAAAAAAAAAAAAAAAA (31)  
CCCATCCTTTAAAAAAAAAAAAAAAAAAAAA (14)  
CCCATCCTTTAAAAAAAAAAAAAAAAAAAAAT (17)  
CCCATCCTTTAAAAAAAAAAAAAAAAAAAAAT (14)

### *dis3l2Δ*

CCCATCCTTTAAAAAAAAAAAAAAAAAAAAAT (23)  
CCCATCCTTTAAAAAAAAAAAAAAAAAAAAA (34)  
CCCATCCTTTAAAAAAAAAAAAAAAAAAAAA (49)  
CCCATCCTTTAAAAAAAAAAAAAAAAAAAAAT (29)  
CCCATCCTTTAAAAAAAAAAAAAAAAAAAAA (23)  
CCCATCCTTTAAAAAAAAAAAAAT (12)  
CCCCAAAAAAAAAAAAAAAAAAAAA (15)  
CCCATCCTTTAAAAAAAAAAAAAT (13)  
CCCCAAAAAAAAAAAAAAAAAAAAA (25)  
CCCCAAAAAAAAAAAAAT (9)  
CCCATCCTTTAAAAAAAAAAAAAT (14)  
CCCATCCTTTAAAAAAAAAAAAAAAAAAAAA (18)

### *lsm1Δ*

CTTTTCTTTTCTCCTCCTCCTCGTTCAT (-171)  
CAAACCATCTCGGGGTTAGAGT (-246)  
CCCATCCTTTAAAAAAAT (7)  
CCCATCCTTTAAAAAAAAAAAAATTT (14)  
CCCATCCTTTAAAAAAAAAAAAATTT (12)  
CCCATCCTTTAAAAAAAAAAAAAT (10)  
CCCATCCTTTAAAAAAAT (6)  
CCCATCCTTTAAAAAAAAAAAA (10)  
CCCATCCTTTAAAAAAAAAAAAAAAAAAAAAAAAAAAA (26)  
CCCATCCTTTAAAAAAAAAAAAAT (10)  
CCCATCCTTTAAAAAAAAAAAAAAAAAAAAAAAAAAAA (26)  
CCCATCCTTTAAAAAAAAAAAAAAAAAAAAAAAAAAAA (18)  
CCCATCCTTTAAAAATTT (5)  
CCCATCCTTTAAAAAAAAAAAAATTT (13)  
CCCATCCTTTAAAAATTT (4)  
CCCATCCTTTAAAAAAATTT (8)

### *dis312Δ lsm1Δ*

TGTTTTGTATAGAAATCAATGTTTT (-20)  
GGACGATTGTACCTTTGAAAATTTT (-55)  
GATTGTACCTTTGAAAACCAAATTT (-52)  
GGACGATTGTACCTTTGAAAACCAACT (-50)  
TGTTTTGTATAGAAATCAATGT (-20)  
TGTTTTGTATAGAAATTTTT (-25)  
CCTTTGAAAATTTT (-55)  
TTTTGCATGTTTTTTTATT (-35)  
CCCATCCTTTAAAAAAAAAAAAAAAAAAAAATTT (18)  
CAACTACTTTTGCATGTTTT (-34)  
CCCATCCTTTAAAAAAAAGAAAAAAATTT (17)  
TTAGAATCCCATTT (-4)  
CAACTACTTTTGCATGTTTT (-34)  
TTTTGTATAGAAATC (-23)  
TTAGAATCCCATTT (-4)  
TTTTGCATGTTCTTTTTT (-36)  
TTAGAATCCCATTTTTTTTTT (-4)  
CCCATCCTTTAAAAAAATTT (8)

**Figure S9** Sequences of 3'-ends of *adh1*<sup>+</sup> transcripts obtained in 3' RACE experiment from different yeast strains. The non-genome encoded thymines are colored in red. Length of poly(A) tail is represented by the positive values in the brackets, and the extension of the 3'-end trimming is represented by the negative value. Nucleotides were counted from polyadenylation site (zero point).

## Supplementary Figure 10

A

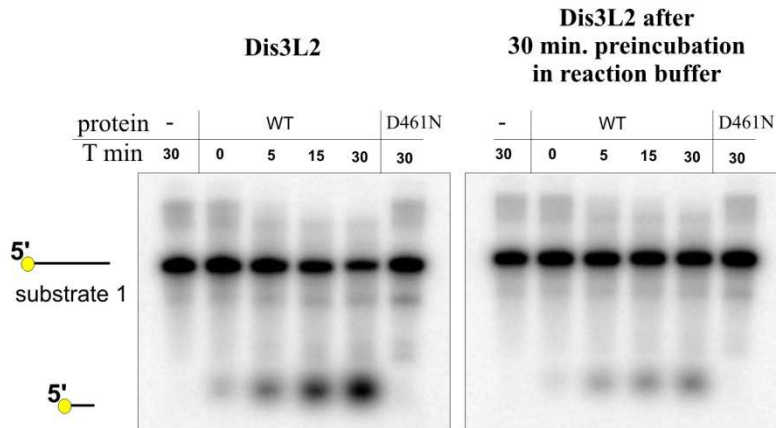

B

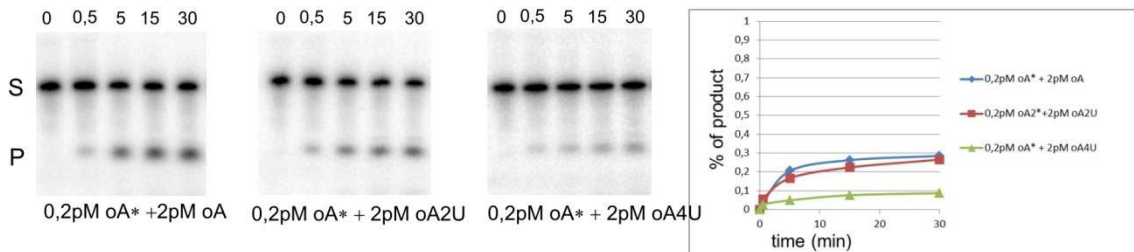

**Figure S10 (A)** Dis3L2 loses its activity over time in the reaction conditions. 0.5 pmols of Dis3L2 or mutated protein version (D461N) were incubated with 2pmols of 5' labeled substrate 1 for 30 minutes or first pre-incubated 30 minutes in reaction buffer in 30°C and subsequently supplemented with the substrate and incubated another 30 minutes. Reactions were stopped at indicated times and products were separated on denaturing polyacrylamide gels **(B)** Uracil residues added to the 3' end can effectively target RNA substrates for degradation by Dis3L2 *in vitro*. Addition of non-labeled uridylated substrates inhibits degradation of labeled adenylated RNAs. Equal amounts of Dis3L2 protein were incubated with the indicated amounts of different RNA substrates (RNA oligonucleotides sequence in Fig.7 and Supplementary Table 1). Reactions with radioactive substrates (labeled with \*) were supplemented with non-labeled oligonucleotides. Reactions were stopped at the indicated time points (top of the gels) and separated on denaturing polyacrylamide gels. Graphs on the right side depict the accumulation of the reaction product at different time points as calculated using Image Quant.

## Supplementary Tables

**Supplementary Table 1** Strains used in this study

| Strain | Genotype                                                                                   | Creator    |
|--------|--------------------------------------------------------------------------------------------|------------|
| MGF10  | <i>h- ade6-M210 his3-D1 leu1-32 ura4-D18</i>                                               | J Cooper   |
| MGF11  | <i>h- ade6-M210 his3-D1 leu1-32 ura4-D18</i>                                               | J Cooper   |
| MGF1   | <i>h-</i>                                                                                  |            |
| MGF2   | <i>h+</i>                                                                                  |            |
| MGF3   | <i>h- ade6-M210 his3-D1 leu1-32 ura4-D18 dis312::KanMX4</i>                                | Bioneer    |
| MM1    | <i>h- ade6-M210 his3-D1 leu1-32 ura4-D18 dis312::dis312-GFP-KanMS6</i>                     | this study |
| MM2    | <i>h- ade6-M210 his3-D1 leu1-32 ura4-D18 dis312::dis312-GFP-KanMS6 dcp2::dcp2-mRFP-hph</i> | this study |
| MM3    | <i>h- ade6-M210 his3-D1 leu1-32 ura4-D18 dis312::dis312-GFP-KanMS6 pabp::pabp-mRFP-hph</i> | this study |
| MM4    | <i>h- ade6-M210 his3-D1 leu1-32 ura4-D18 dis312::dis312-GFP-KanMS6 dis3::dis3-mRFP-hph</i> | this study |
| MM5    | <i>h- ade6-M210 his3-D1 leu1-32 ura4-D18 dis3::dis3-GFP-KanMS6</i>                         | this study |
| MM6    | <i>h- ade6-M210 his3-D1 leu1-32 ura4-D18 rrp43::rrp43-GFP-KanMS6</i>                       | this study |
| MM7    | <i>h- ade6-M210 his3-D1 leu1-32 ura4-D18 dis3::dis3-TAPtag-KanMS6</i>                      | this study |
| MM8    | <i>h- ade6-M210 his3-D1 leu1-32 ura4-D18 rrp43::rrp43-TAPtag-KanMS6</i>                    | this study |
| MM9    | <i>h- ade6-M210 his3-D1 leu1-32 ura4-D18 dis312::dis312-TAPtag-KanMS6</i>                  | this study |
| MM10   | <i>h- dis312::KanMS6</i>                                                                   | this study |
| MM11   | <i>h- dis312::hph</i>                                                                      | this study |
| MM12   | <i>h+ dis312::hph</i>                                                                      | this study |
| MM13   | <i>h- xrn1::hph</i>                                                                        | this study |
| MM14   | <i>h+ xrn1::hph</i>                                                                        | this study |
| MM15   | <i>h- dis312::KanMS6 ski2::hph</i>                                                         | this study |
| MM16   | <i>h- ski2::hph</i>                                                                        | this study |
| MM17   | <i>h- dis312::KanMS6 lsm1::hph</i>                                                         | this study |
| MM18   | <i>h- lsm1::hph</i>                                                                        | this study |
| MM19   | <i>h- dcp2::dcp2-GFP-KanMS6</i>                                                            | this study |
| MM20   | <i>h- dis312::hph dcp2::dcp2-GFP-KanMS6</i>                                                | this study |



**Supplementary Table 2** Oligonucleotides and substrates used in this study.

|                              |                                                                                                                              |
|------------------------------|------------------------------------------------------------------------------------------------------------------------------|
| RNA substrates               |                                                                                                                              |
| Substrate 1                  | GUUUUGUAUAGAAAUCA AUG                                                                                                        |
| Substrate 2                  | CCCGACACCAACCACUAAAAAAAAAAAAAAAA                                                                                             |
| oA                           | CACCAACCACUAAAAAAAAAAAAAAAA                                                                                                  |
| oA2U                         | CACCAACCACUAAAAAAAAAAAAAAAAU                                                                                                 |
| oA4U                         | CACCAACCACUAAAAAAAAAAAAUUUU                                                                                                  |
| Poli(U)                      | UUUUUUUUUUUUUUUUUUUUUUUUUUUUUUUUUU                                                                                           |
| Poli(A)                      | AAAAAAAAAAAAAAAAAAAAAAAAAAAAAAAA                                                                                             |
| Internally labeled substrate | GAAAUAAUUUGUAAUUGCAACUAAUUUUCUGUAACAUAGUGUGAUUAAUUUU<br>CAGUAGGGGUUUAUAAAAUUGAAGGAUAAGAUUAUUGAUUAACGCAA<br>UAACCUAAUUUUCAGAG |
| DNA oligonucleotides         |                                                                                                                              |
| Substrate3 (DNA)             | AGTGGTTGGTGTCTCGG                                                                                                            |
| 18SrRNAprobe                 | ACCAGACTTGCCCTCCAATTGTTCC                                                                                                    |
| 25SrRNAprobe                 | ACCTTGGAGACCTGCTGCGGTTATG                                                                                                    |
| Primers                      |                                                                                                                              |
| L_fba1_probe                 | CATCCCTGCCATTAACGTCAC                                                                                                        |
| R_fba1_probe                 | GACGTAGGCGAATTGGGTATC                                                                                                        |
| L_pabp_probe                 | TACTCGCCGTTCTTTGGG                                                                                                           |
| R_pabp_probe                 | ACCTGCTTCTGCTTTCC                                                                                                            |
| L_hsc1_probe                 | AGGGCAATGCTCGTCCTAC                                                                                                          |
| R_hsc1_probe                 | GAGGCAGCCAAACCAGAAC                                                                                                          |
| L_pyk1_probe                 | CTCCGTGATGCTGGTATG                                                                                                           |
| R_pyk1_probe                 | GCTGGTGGACAAGACAAC                                                                                                           |
| L_pgk1_probe                 | CACCAACAATGCCCGTATCG                                                                                                         |
| R_pgk1_probe                 | TCCACAGTCCAAACCCATCC                                                                                                         |
| L_act1_probe                 | CTATGTATCCCGGTATTGCC                                                                                                         |
| R_act1_probe                 | GGAGCTTAGAAGCACTTACG                                                                                                         |
| L_rrg1_probe                 | CACGAACAGCCTTCTTACTC                                                                                                         |
| R_rrg1_probe                 | GAGCCAAAGTCTTCTTACC                                                                                                          |
| L_adh1_probe                 | CACCGATTTACACGCTCTTC                                                                                                         |
| R_adh1_probe                 | GAAAGGTCCAAGACGATACG                                                                                                         |
| L_pik1_probe                 | GCTGGTAAAAATGTTGTTAC                                                                                                         |
| R_pik1_probe                 | TAGTAAATTCCGTTCCG                                                                                                            |
| L_nmt1_probe                 | TATGAGCGTGAAGGGATTGAG                                                                                                        |
| R_nmt1_probe                 | CGACATAACGAAGTGAGTTGC                                                                                                        |
| 1 <sup>st</sup> _adh_PASE    | CAAGATTGCCGCGCGTATCG                                                                                                         |
| 2 <sup>nd</sup> _adh_PASE    | TTTCACCACACGTTTATACC                                                                                                         |
| L_TAPtagSLIC                 | CGCTGCAGGTCGACGGATCCCCGGGTTAATTAACATGG AAAAGAGAAGATGGA                                                                       |
| R_TAPtagSLIC                 | TAAGAAATTCGCTTATTTAGAAGTGCGCGCCTCAGGT TGACTTCCCCGCGG                                                                         |
| L_mut_Dis3l2                 | CAGCTCGAGACTTGAATGATGCTGTTTC                                                                                                 |
| P_mut_Dis3l2                 | GAAACAGCATCATTCAAGTCTCGAGCTG                                                                                                 |
| L_clon_Dis3l2                | ATGAATTCATGGATTTAAAACCAAATATTAG                                                                                              |
| P_clon_Dis3l2                | TACTCGAGTTAATTCAAAGAACTAGAC                                                                                                  |

\*all the primers used for *S. pombe* gene deletions and integrations were designed using PPP: Pombe PCR Primer Programs tool (Penkett et al, 2006) and are not included in this list, as well as primers used for checking integration in the obtained strains.

Standard primers for 3' linker used in PASE reaction (Alexander et al, 2010) are not included in the table.

**Supplementary Table 3** Sequences used in protein comparison and phylogenetic analyzes. Accession numbers from NCBI Entrez with the exception of \*.

| Name        | Family  | Species                              | Accession#         |
|-------------|---------|--------------------------------------|--------------------|
| Dis3_Amel   | Dis3    | <i>Apis mellifera</i>                | XP_397381          |
| Dis3L2_Amel | Dis3_L2 | <i>Apis mellifera</i>                | XP_624734          |
| Dis3_Cele   | Dis3    | <i>Caenorhabditis elegans</i>        | NP_501835          |
| Dis3L2_Cele | Dis3_L2 | <i>Caenorhabditis elegans</i>        | NP_498160          |
| Dis3_Cint   | Dis3    | <i>Ciona intestinalis</i>            | XP_002132066       |
| Dis3L2_Cint | Dis3_L2 | <i>Ciona intestinalis</i>            | XP_002119190       |
| Dis3_Drer   | Dis3    | <i>Danio rerio</i>                   | XP_001336850       |
| Dis3L_Drer  | Dis3L   | <i>Danio rerio</i>                   | NP_001103928       |
| Dis3L2_Drer | Dis3L2  | <i>Danio rerio</i>                   | XR_084214          |
| Dis3_Dpul   | Dis3    | <i>Daphnia pulex</i>                 | EFX89559           |
| Dis3L2_Dpul | Dis3L2  | <i>Daphnia pulex</i>                 | EFX64669           |
| Dis3_Dmel   | Dis3    | <i>Drosophila melanogaster</i>       | NP_651246          |
| Dis3L2_Dmel | Dis3L2  | <i>Drosophila melanogaster</i>       | NP_728490          |
| Dis3_Ggal   | Dis3    | <i>Gallus gallus</i>                 | XP_417016          |
| Dis3L_Ggal  | Dis3L   | <i>Gallus gallus</i>                 | XP_003641875       |
| Dis3L2_Ggal | Dis3L2  | <i>Gallus gallus</i>                 | XP_422741          |
| Dis3_Hmag   | Dis3    | <i>Hydra magnipapillata</i>          | XR_053815          |
| Dis3L2_Hmag | Dis3L2  | <i>Hydra magnipapillata</i>          | XP_002154262       |
| Dis3_Mmus   | Dis3    | <i>Mus musculus</i>                  | NP_082591          |
| Dis3L_Mmus  | Dis3L   | <i>Mus musculus</i>                  | NP_001001295       |
| Dis3L2_Mmus | Dis3L2  | <i>Mus musculus</i>                  | NP_705758          |
| Dis3L_Nvec  | Dis3L   | <i>Nematostella vectensis</i>        | XP_001632370       |
| Dis3L2_Nvec | Dis3L2  | <i>Nematostella vectensis</i>        | XP_001634492       |
| Dis3_Nvec   | Dis3    | <i>Nematostella vectensis</i>        | 10544 gw.129.26.1* |
| Dis3_Osat   | Dis3    | <i>Oryza sativa</i>                  | EEE58267           |
| Dis3L2_Osat | Dis3L2  | <i>Oryza sativa</i>                  | NP_001048152       |
| Dis3_Ppat   | Dis3    | <i>Physcomitrella patens</i>         | XP_001766083       |
| Dis3L2_Ppat | Dis3L2  | <i>Physcomitrella patens</i>         | XP_001773680       |
| Dis3_Scer   | Dis3    | <i>Saccharomyces cerevisiae</i>      | NP_014621          |
| Dis3_Spo    | Dis3    | <i>Schizosaccharomyces pombe</i>     | NP_596653          |
| Dis3L2_Spo  | Dis3_L2 | <i>Schizosaccharomyces pombe</i>     | NP_594510          |
| Dis3_Umay   | Dis3    | <i>Ustilago maydis</i>               | XP_759849          |
| Dis3L2_Umay | Dis3L2  | <i>Ustilago maydis</i>               | XP_757367          |
| Dis3_Xtro   | Dis3    | <i>Xenopus (Silurana) tropicalis</i> | NP_001120564       |
| Dis3L_Xtro  | Dis3L   | <i>Xenopus (Silurana) tropicalis</i> | NP_001072835       |
| Dis3L2_Xtro | Dis3L2  | <i>Xenopus (Silurana) tropicalis</i> | NP_001072804       |
| Dis3L_Hsap  | Dis3L   | <i>Homo sapiens</i>                  | NP_001137160       |
| Dis3_Hsap   | Dis3    | <i>Homo sapiens</i>                  | NP_055768          |
| Dis3L2_Hsap | Dis3L2  | <i>Homo sapiens</i>                  | NP_689596          |
| Dis3_Ptri   | Dis3    | <i>Populus trichocarpa</i>           | XP_002303419       |
| Dis3L2_Ptri | Dis3L2  | <i>Populus trichocarpa</i>           | XP_002302251       |
| Dis3_Atha   | Dis3    | <i>Arabidopsis thaliana</i>          | NP_565418          |
| SOV_Atha    | Dis3_L2 | <i>Arabidopsis thaliana</i>          | NP_177891          |

\* Sequence not available in NCBI Entrez at the time of writing. Protein ID and Name from the Genome Portal of the Department of Energy Joint Genome Institute (Grigoriev et al, 2012) provided instead.

**Supplementary Table 4** Proteins co-purified with Dis3TAP or Rrp43TAP and identified by mass-spectrometry.

Protein or gene names are listed by score order. Known exosome complex subunits and interacting proteins are underlined

| Dis3TAP             | Rrp43TAP            |
|---------------------|---------------------|
| <u>dis3</u>         | <u>dis3</u>         |
| <u>tdh1</u>         | <u>rrp45</u>        |
| <u>rrp46</u>        | <u>rrp4</u>         |
| <u>rrp45</u>        | <u>rrp42</u>        |
| <u>rrp42</u>        | <u>rrp46</u>        |
| <u>rrp4</u>         | <u>fas2</u>         |
| <u>rrp40</u>        | <u>rrp40</u>        |
| <u>fas2</u>         | <u>rrp43</u>        |
| <u>rrp43</u>        | <u>fas1</u>         |
| <u>rrp41</u>        | <u>rrp41</u>        |
| <u>fas1</u>         | <u>rrp6</u>         |
| <u>gpm1</u>         | <u>mtr3</u>         |
| <u>rp14a</u>        | <u>csl4</u>         |
| <u>csl4</u>         | <u>sks2</u>         |
| <u>tef1a</u>        | <u>act1</u>         |
| <u>mtr3</u>         | <u>ssa2</u>         |
| <u>pyk1</u>         | <u>rpp201</u>       |
| <u>tef3</u>         | <u>tef1b</u>        |
| <u>eno101</u>       | <u>gpd3</u>         |
| <u>egd2</u>         | <u>rpa5</u>         |
| <u>ssa2</u>         | <u>SPAC24C9.12c</u> |
| <u>pgk1</u>         | <u>gua1</u>         |
| <u>pda1</u>         | <u>ura1</u>         |
| <u>swo1</u>         | <u>pda1</u>         |
| <u>SPBC16A3.08c</u> | <u>rp14b</u>        |
| <u>gua1</u>         | <u>arg5</u>         |
| <u>act1</u>         | <u>SPAP8A3.05</u>   |
| <u>rpp201</u>       | <u>SPACUNK4.11c</u> |
| <u>rrp6</u>         | <u>pdb1</u>         |
| <u>SPCC794.07</u>   | <u>SPCC794.07</u>   |
| <u>his1</u>         | <u>rps18a</u>       |
| <u>pdb1</u>         | <u>hsp60</u>        |
| <u>rp17c</u>        | <u>rpp203</u>       |
| <u>ura1</u>         | <u>rp114</u>        |
| <u>SPAC1F8.07c</u>  | <u>SPCC1235.01</u>  |
| <u>rpp203</u>       | <u>rp125a</u>       |
| <u>adh1</u>         | <u>rps7</u>         |
| <u>rpa5</u>         | <u>rpp202</u>       |
| <u>rps3</u>         | <u>rp130a</u>       |
| <u>hsp60</u>        | <u>SPCC1827.03c</u> |
| <u>fba1</u>         | <u>SPCC1739.07</u>  |
| <u>sce3</u>         | <u>rp118b</u>       |
| <u>rps2</u>         | <u>cct4</u>         |
| <u>wis2</u>         | <u>fta5</u>         |
| <u>cct2</u>         | <u>rps23a</u>       |
| <u>rps7</u>         | <u>cct5</u>         |
| <u>SPBC8D2.18c</u>  | <u>rp128e</u>       |
| <u>rps18a</u>       |                     |
| <u>vas2</u>         |                     |
| <u>sgt2</u>         |                     |
| <u>arg5</u>         |                     |
| <u>rpa1</u>         |                     |
| <u>rps6a</u>        |                     |
| <u>cdc48</u>        |                     |
| <u>rps5b</u>        |                     |
| <u>sla1</u>         |                     |
| <u>rp16</u>         |                     |
| <u>rps0b</u>        |                     |
| <u>SPCC1739.07</u>  |                     |
| <u>rp11201</u>      |                     |
| <u>rp125a</u>       |                     |
| <u>rp118a</u>       |                     |
| <u>lys4</u>         |                     |
| <u>rps22a</u>       |                     |
| <u>cdc48</u>        |                     |

|                   |               |
|-------------------|---------------|
| fta5              | sla1          |
| tef-1             | tif471        |
| ssp1              | ssp1          |
| rps19a            | htb1          |
| SPCC1259.09c      | puf6          |
| SPAC9.09          | eft1          |
| gpd1              | SPCC364.06    |
| eft1              | rpl27a        |
| SPAC24C9.12c      | rpl7c         |
| SPAC22A12.16      | SPAC222.08c   |
| ilv5              | rpp0          |
| btf3              | rpt3          |
| rpl11a            | hsp10         |
| SPBC24C6.04       | rpl35         |
| eca39             | rpl7b         |
| rpl30a            | swol          |
| pab1              | pfk1          |
| mbf1              | SPAC12G12.07c |
| sua1              | rpl37b        |
| cof1              | rpl37b        |
| SPCC1827.03c      | cct6          |
| rps16a            | mlo3          |
| rpl23a            | tea3          |
| SPAC1782.11       | rpn7          |
| rpl7b             | rps4c         |
| rpl14             | btf3          |
| cct6              | rps14a        |
| <u>SPAP8A3.05</u> | rpl22         |
| SPCC1235.01       | dld1          |
| rpl27a            | rpl6          |
| rpl28e            | rps15b        |
| p23fy             | tfs1          |
| vma10             | rps102        |
| rps6b             | tif213        |
| krs1              | ubi3          |
| SPCC1223.14       | rpl8          |
| rps0a             | rps2          |
| rpp202            | rpl17b        |
| rps14a            | rpc19         |
| SPCC191.02c       | rps5b         |
| gly1              | tif211        |
| hsp10             | rpl13         |
| rps102            | rpl36a        |
| rpl35             | rpl16a        |
| rpl18b            | SPAC1F8.07c   |
| cut6              | rpl1201       |
| rpl24b            | SPBC1734.11   |
| sti1              | tcg1          |
| SPAC12G12.07c     | cut6          |
| SPBC354.10        | ppt1          |
| rps20             |               |
| rps4c             |               |
| rps23a            |               |
| SPCC584.01c       |               |
| SPAPB1E7.07       |               |
| srp2              |               |
| aro4              |               |
| SPBC660.16        |               |
| tif211            |               |
| rpp0              |               |
| rpl13             |               |
| rps21             |               |
| rps12a            |               |
| but2              |               |
| mge1              |               |
| SPCC364.06        |               |
| sir1              |               |
| rpl2a             |               |
| SPAC222.08c       |               |
| rki1              |               |
| inh1              |               |
| rpl31             |               |
| cdc37             |               |
| ura5              |               |
| rpl36a            |               |

gpx1  
cdc8  
rpl10b  
htb1  
SPBP8B7.05c  
SPAC26F1.13c  
nup61  
arg4  
mlo3  
rps4b  
rpn2  
rpl17b  
SPAC1805.02c  
fim1  
rps17a  
rpt3  
tea3  
SPAC4F10.19c  
arg1  
dbp2  
rps9a  
hub1  
rps0b  
SPAC17A5.15c  
atp2  
pmt3  
tif1  
SPAC24H6.10c  
SPBC1711  
lys3  
rpl37b  
rps101  
SPBC1703.07  
SPBC19C7.06  
SPBC18E5.07  
rpl28a  
rps10b  
pmp20  
SPAC8C9.04  
mmf1  
rpl22  
rad25  
tim13  
rpb4  
rpl15b  
erg10  
SPBC2F12.05c  
bip1  
hsp9  
SPBC21B10.03c  
cct8  
cct4  
SPAPB24D3.07c  
rpl5a  
tif471  
ypt1  
rkp1  
hts1  
tal1  
lys1  
SPBC1539.06  
grx4  
rpl20a  
rad24  
SPBC776.15c  
SPCC1183.02  
rpl3b  
cpy1  
dld1  
shm2  
plb1  
shg1  
tpx1  
SPBC713.03  
rps8b

rps27  
cyc1  
rpl8  
ubi3  
SPBC1734.11  
rps30a  
tpi1  
sui1  
clc1  
mpd2  
tef3  
mri1  
eif3f  
SPBC1271.04c  
SPAC10F6.16  
rps13  
tif213  
pan1  
SPBC359.05  
SPCC965.06  
SPAC25G10.08  
SPAC29E6.06c  
SPAC13G7.06  
arc4  
vip1  
SPBC1198.05  
tif11  
rps15a  
SPBC776.03  
teg1  
SPAC1F5.11c  
ppt1  
cct5  
rps24b  
rpl16a  
SPAC9E9.09c  
utp22  
SPAC1F5.06  
mug125  
mts2  
eif3m  
hmt2  
rrf1  
nhp6  
SPAC22E12.19  
SPAC23H3.15c  
uba2  
dps1  
SPBP4H10.15  
srp54  
hvk1  
hrq1  
aru1  
SPAC5H10.03  
SPBC30D10.05c  
SPBC14C8.04  
ino80  
SPBC29A3.16  
rhh1  
mdn1  
srp72  
ded1  
SPAC926.08c  
prs3  
SPAC458.04c  
let1  
SPBC337.07c  
smd1  
utp20  
SPMIT.03

## References

- Alexander RD, Barrass JD, Dichtl B, Kos M, Obtulowicz T, Robert MC, Koper M, Karkusiewicz I, Mariconti L, Tollervey D, Kufel J, Bertrand E, Beggs JD (2010) RiboSys, a high-resolution, quantitative approach to measure the in vivo kinetics of pre-mRNA splicing and 3'-end processing in *Saccharomyces cerevisiae*. *RNA* **16**: 2570-2580
- Benjamini Y, Drai D, Elmer G, Kafkafi N, Golani I (2001) Controlling the false discovery rate in behavior genetics research. *Behav Brain Res* **125**: 279-284
- Bolstad BM, Irizarry RA, Astrand M, Speed TP (2003) A comparison of normalization methods for high density oligonucleotide array data based on variance and bias. *Bioinformatics* **19**: 185-193
- Frickey T, Lupas A (2004) CLANS: a Java application for visualizing protein families based on pairwise similarity. *Bioinformatics* **20**: 3702-3704
- Gascuel O (1997) BIONJ: an improved version of the NJ algorithm based on a simple model of sequence data. *Mol Biol Evol* **14**: 685-695
- Gouy M, Guindon S, Gascuel O (2010) SeaView version 4: A multiplatform graphical user interface for sequence alignment and phylogenetic tree building. *Mol Biol Evol* **27**: 221-224
- Grigoriev IV, Nordberg H, Shabalov I, Aerts A, Cantor M, Goodstein D, Kuo A, Minovitsky S, Nikitin R, Ohm RA, Otilar R, Poliakov A, Ratnere I, Riley R, Smirnova T, Rokhsar D, Dubchak I (2012) The genome portal of the Department of Energy Joint Genome Institute. *Nucleic Acids Res* **40**: D26-32
- Hatfield GW, Hung SP, Baldi P (2003) Differential analysis of DNA microarray gene expression data. *Mol Microbiol* **47**: 871-877
- Huson DH, Richter DC, Rausch C, DeZulian T, Franz M, Rupp R (2007) Dendroscope: An interactive viewer for large phylogenetic trees. *BMC Bioinformatics* **8**: 460
- Irizarry RA, Hobbs B, Collin F, Beazer-Barclay YD, Antonellis KJ, Scherf U, Speed TP (2003) Exploration, normalization, and summaries of high density oligonucleotide array probe level data. *Biostatistics* **4**: 249-264
- Li MZ, Elledge SJ (2007) Harnessing homologous recombination in vitro to generate recombinant DNA via SLIC. *Nat Methods* **4**: 251-256

Malecki M, Stepien PP, Golik P (2010) Assays of the helicase, ATPase, and exoribonuclease activities of the yeast mitochondrial degradosome. *Methods Mol Biol* **587**: 339-358

Matsuyama A, Arai R, Yashiroda Y, Shirai A, Kamata A, Sekido S, Kobayashi Y, Hashimoto A, Hamamoto M, Hiraoka Y, Horinouchi S, Yoshida M (2006) ORFeome cloning and global analysis of protein localization in the fission yeast *Schizosaccharomyces pombe*. *Nat Biotechnol* **24**: 841-847

Penkett CJ, Birtle ZE, Bahler J (2006) Simplified primer design for PCR-based gene targeting and microarray primer database: two web tools for fission yeast. *Yeast* **23**: 921-928

Ronquist F, Huelsenbeck JP (2003) MrBayes 3: Bayesian phylogenetic inference under mixed models. *Bioinformatics* **19**: 1572-1574

Sukumaran J, Holder MT (2010) DendroPy: a Python library for phylogenetic computing. *Bioinformatics* **26**: 1569-1571

Swofford D. (2003) PAUP\*. Phylogenetic Analysis Using Parsimony (\*and Other Methods). *Version 4.0b10*. Sinauer Associates, Sunderland, Massachusetts.

Wood V, Harris MA, McDowall MD, Rutherford K, Vaughan BW, Staines DM, Aslett M, Lock A, Bahler J, Kersey PJ, Oliver SG (2012) PomBase: a comprehensive online resource for fission yeast. *Nucleic Acids Res* **40**: D695-699
