# Supplementary material
Source: PubMed Central journal article supplement (PMC3981172)

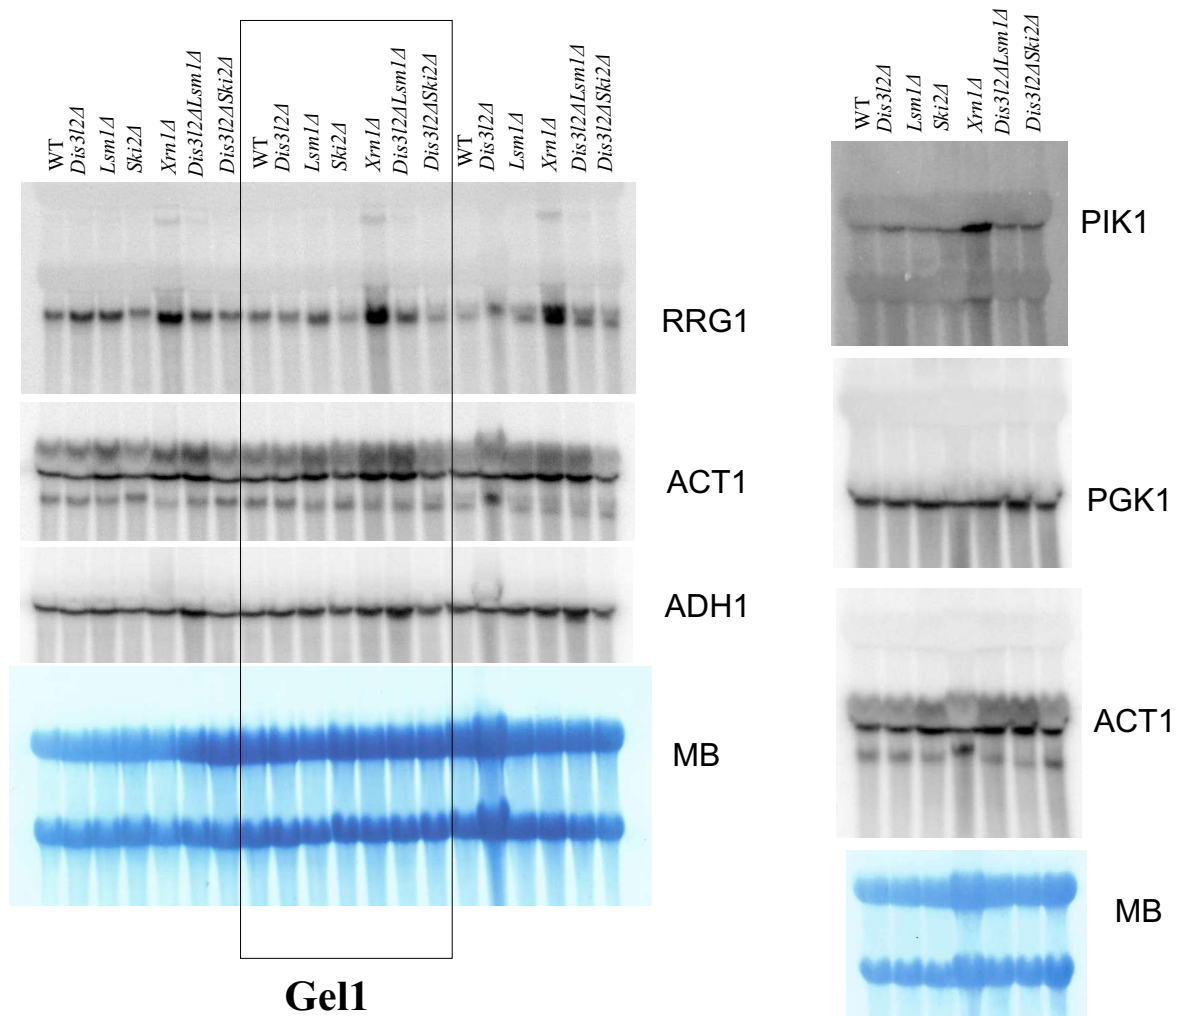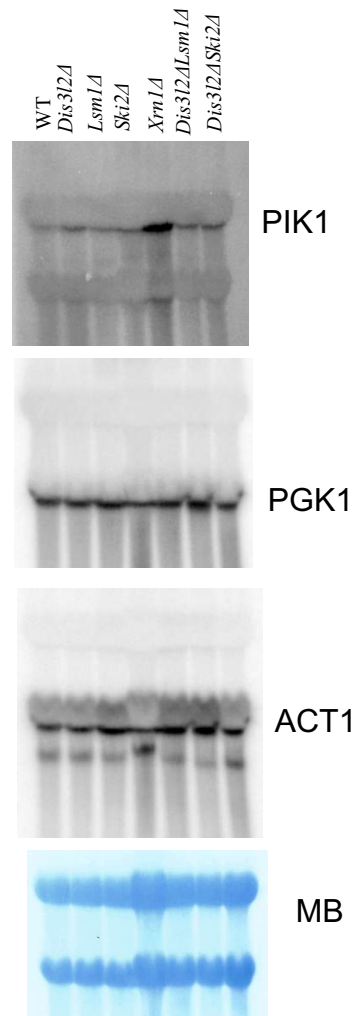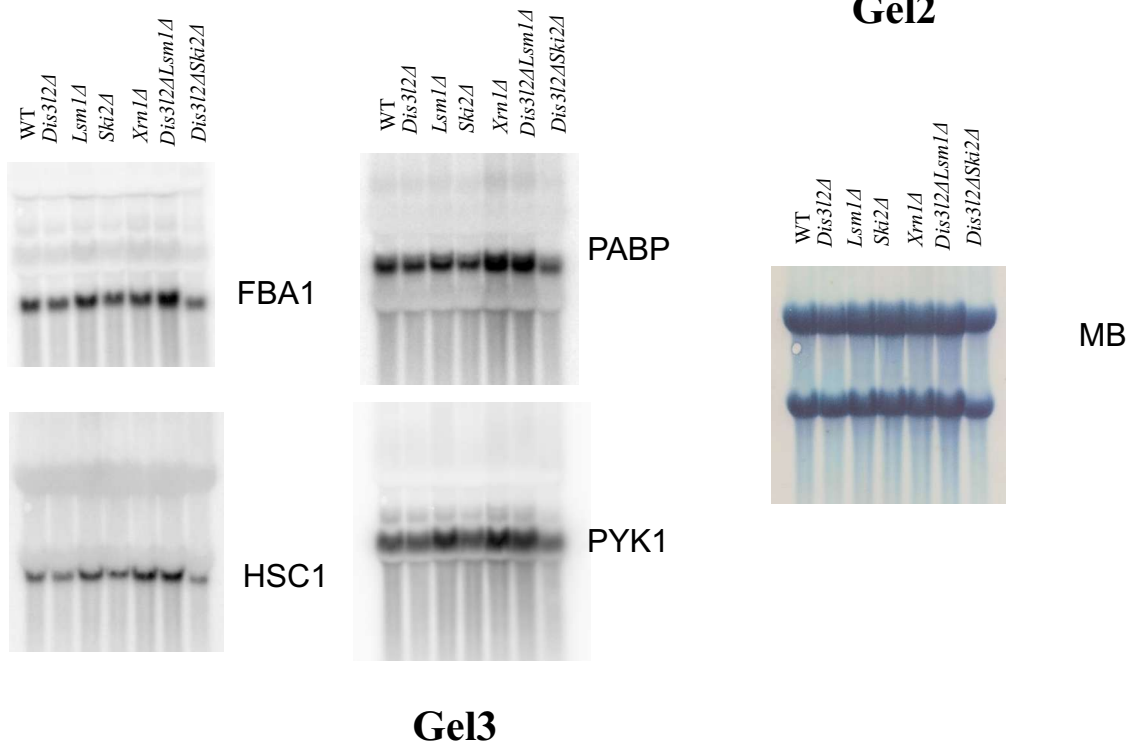

Source Data Fig. 6B

Supplement: emboj201363df6b.pdf [file emboj201363df6b.pdf]

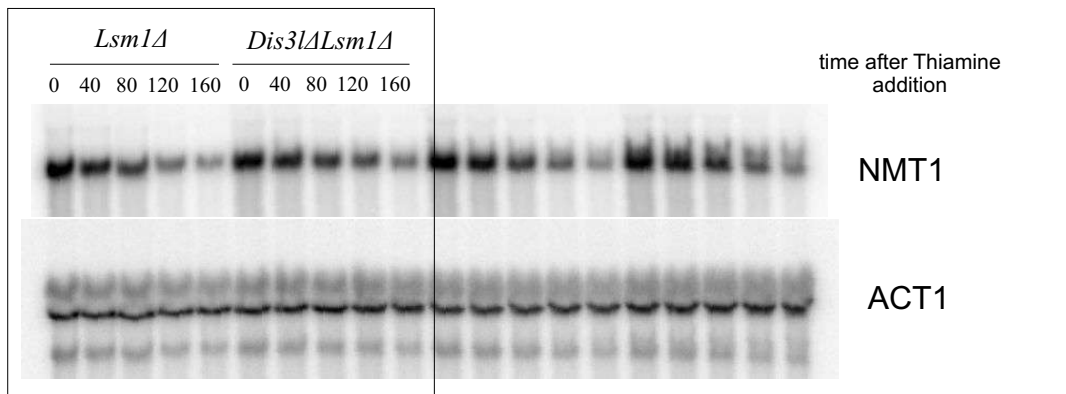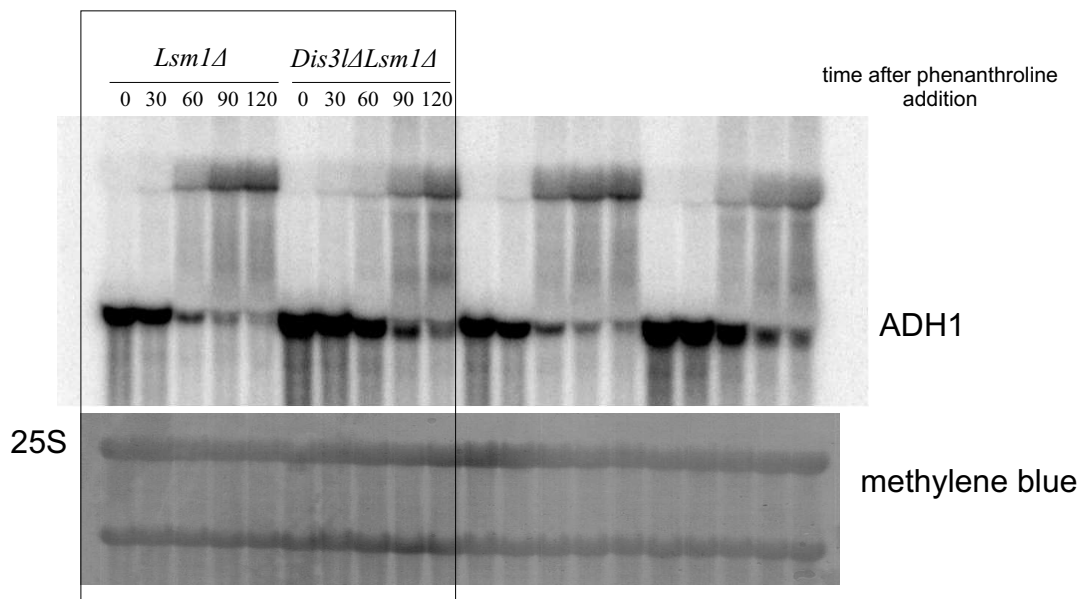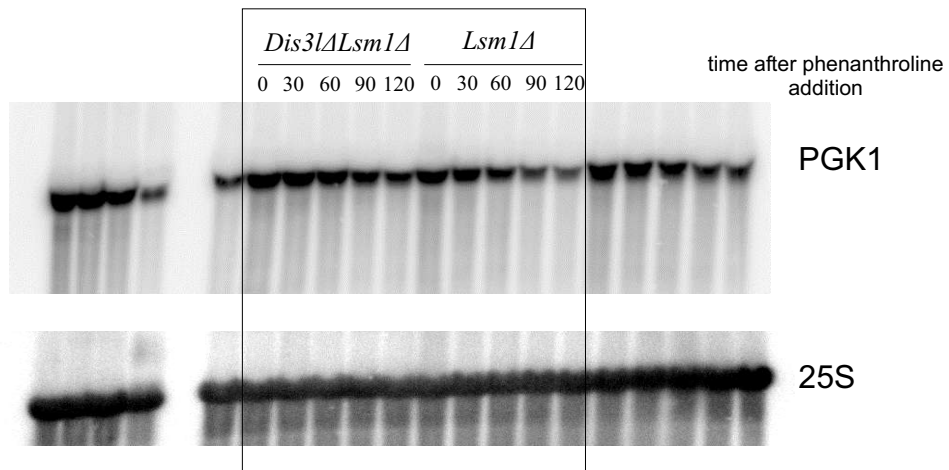

Source Data Fig. 6C

Supplement: emboj201363df6c.pdf [file emboj201363df6c.pdf]

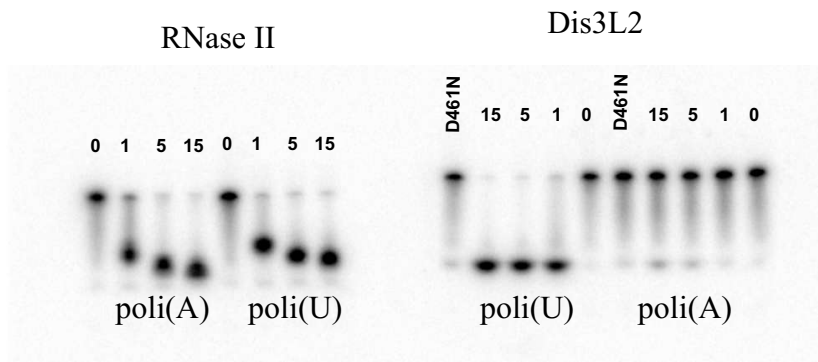

Source Data Fig. 7B

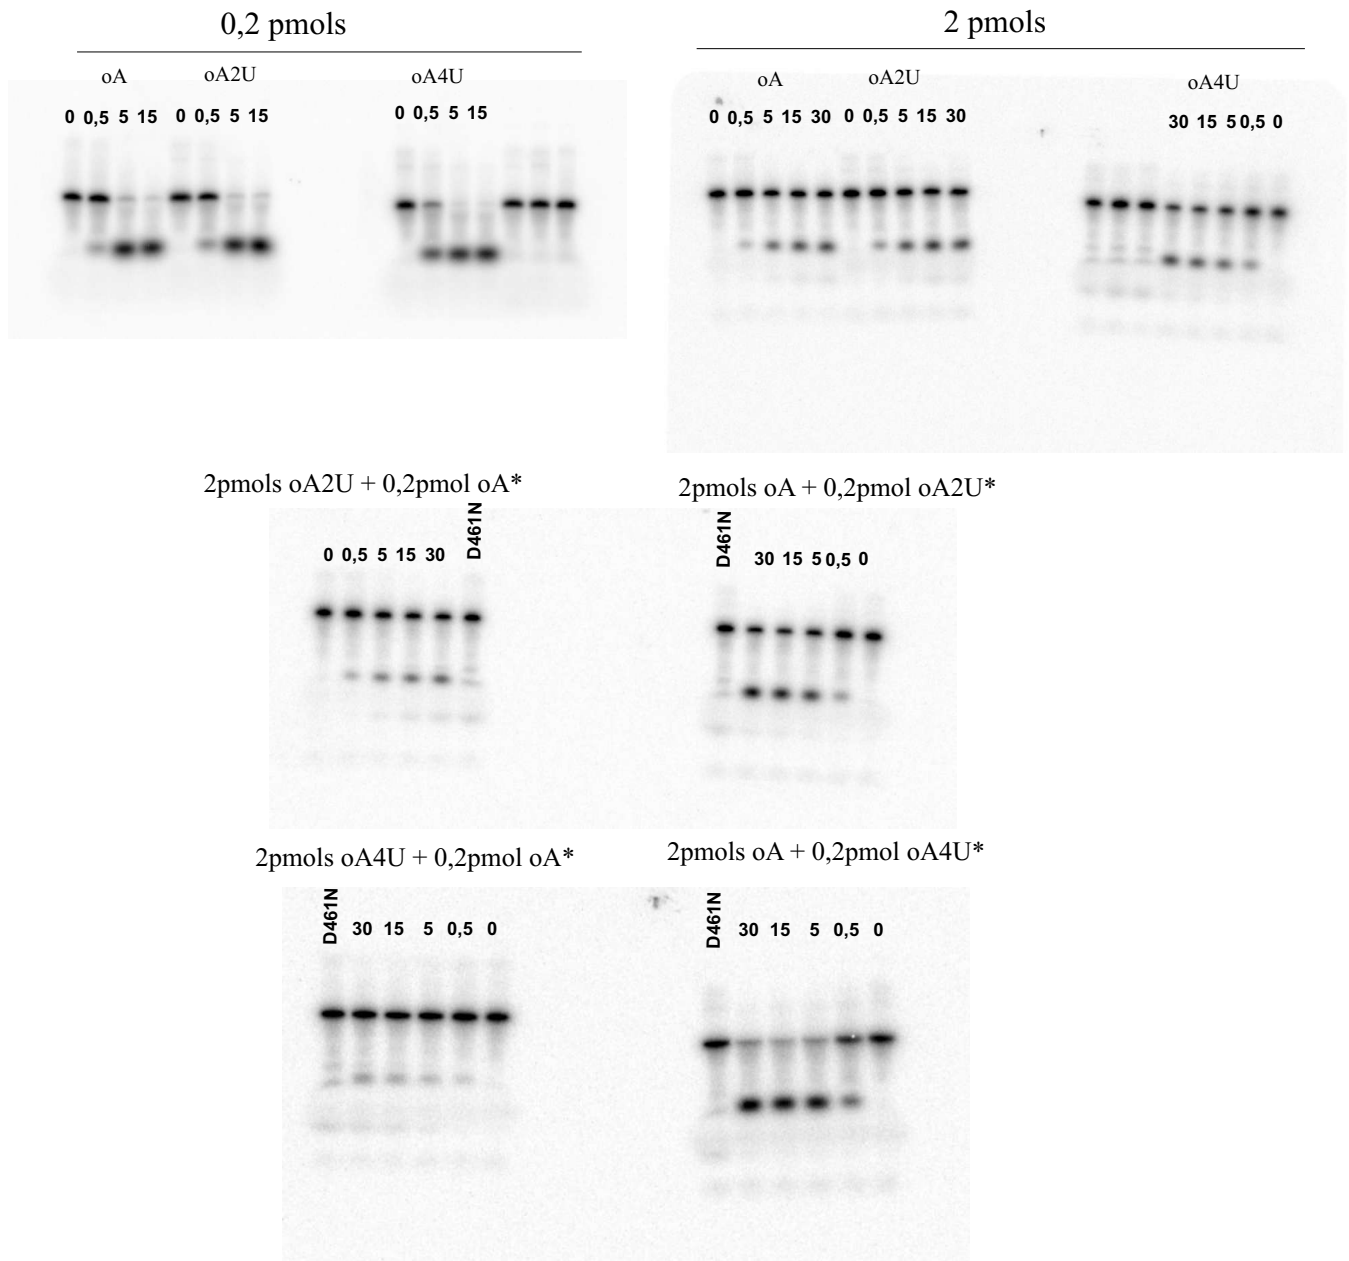

Source Data Fig. 7C

Supplement: emboj201363df7.pdf [file emboj201363df7.pdf]
